# Supplementary material
Source: publisher figshare collection journal article supplement (https://acs.figshare.com/ndownloader/files/31706228)
Supplement: Supplementary file 1 [file 31706228]

## Supporting information

### Tracking the Dynamic Histone Methylation of H3K27 in Live Cancer Cells

Ya Gong<sup>1</sup>, Chujun Wei<sup>1</sup>, Leonardo Cheng<sup>1</sup>, Fengyi Ma<sup>1</sup>, Shaoying Lu<sup>1</sup>, Qin Peng<sup>1</sup>, Longwei Liu<sup>1\*</sup>, Yingxiao Wang<sup>1\*</sup>

1. Department of Bioengineering, Institute of Engineering in Medicine, University of California, San Diego, 9500 Gilman Drive, La Jolla, CA, 92093-0435, USA

\* Corresponding authors: Yingxiao Wang, [yiw015@eng.ucsd.edu](mailto:yiw015@eng.ucsd.edu); Longwei Liu, [lol001@eng.ucsd.edu](mailto:lol001@eng.ucsd.edu)

#### Table of contents:

|                        |    |
|------------------------|----|
| Supplementary Figure 1 | S2 |
| Supplementary Figure 2 | S3 |
| Supplementary Figure 3 | S4 |
| Supplementary Figure 4 | S4 |
| Supplementary Figure 5 | S5 |
| Supplementary Figure 6 | S6 |
| Supplementary Figure 7 | S6 |

## Supplementary Figures

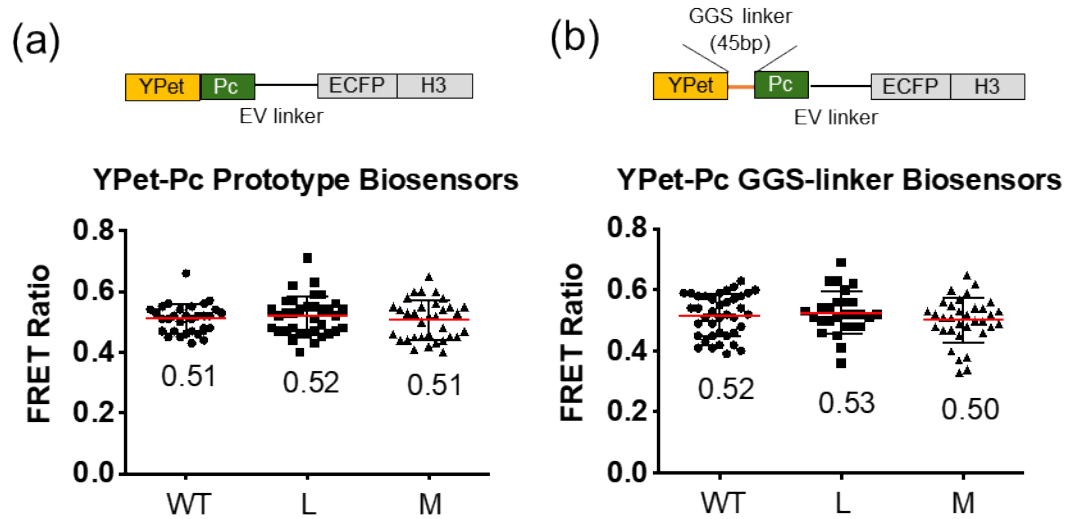

**Supplementary Figure 1. Swapping the positions of YPet and Pc domains in the biosensors with (a) or without (b) GGS linkers both diminished the performance of the GGS-linker and prototype biosensors** (One-way ANOVA test, all these groups have no significant difference). Red line indicates the mean value in all figures.

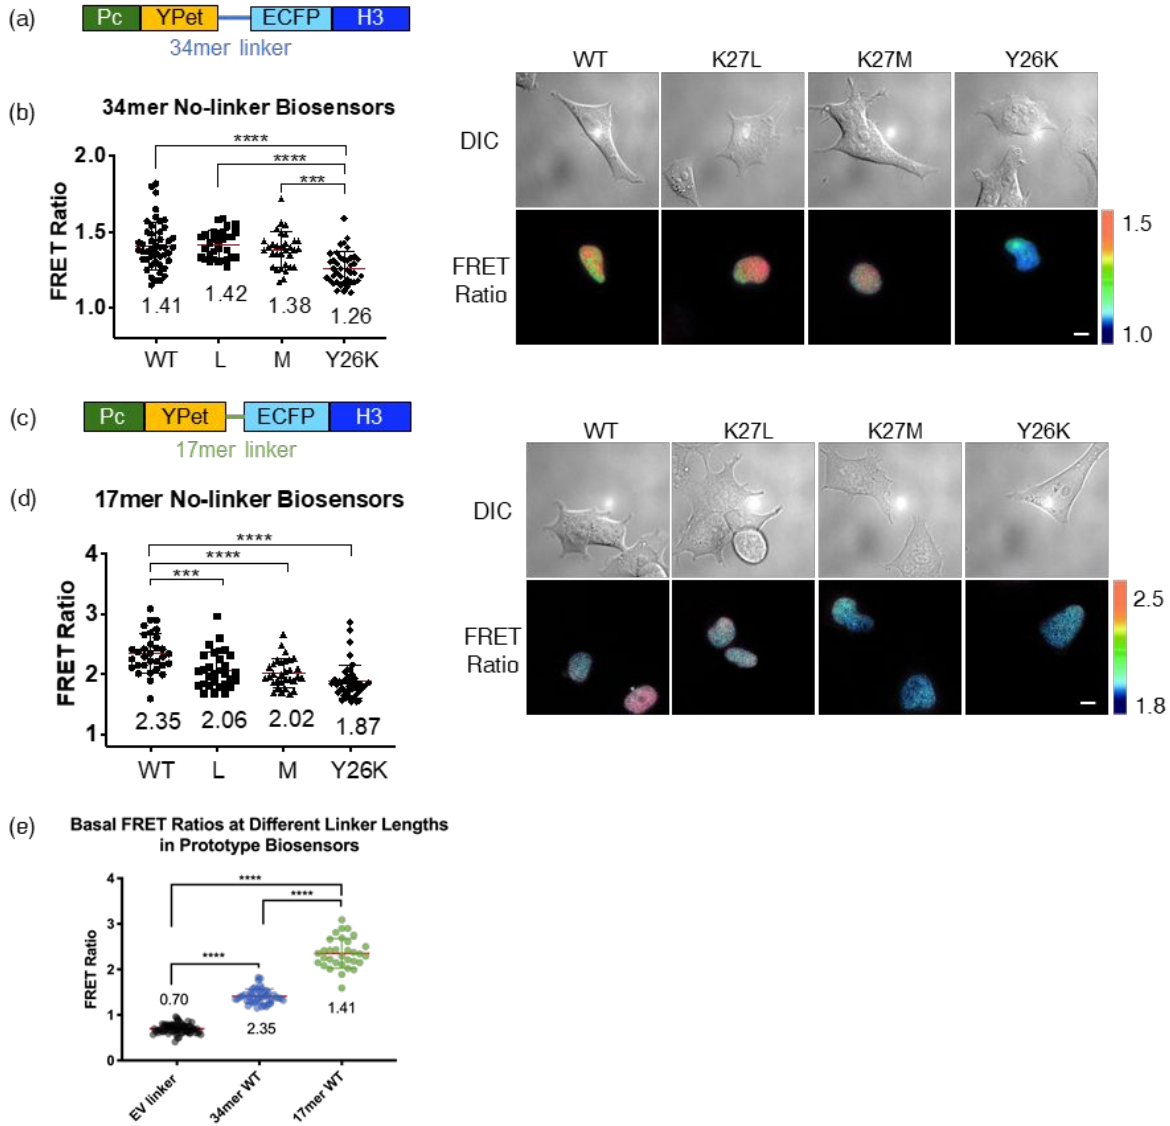

**Supplementary Figure 2. Varying the length of the primary linker in the prototype biosensor without the 15mer GGS linker can affect the biosensor sensitivity.**

- (a) The schematic presentation of the 34mer prototype biosensor.
- (b) The averaged FRET ratios of the wild-type and mutant 34mer prototype biosensors (K27L, K27M, Y26K) (upper panel) and their DIC (middle panel) and FRET ratio images (bottom panel) in HEK cells. (One-way ANOVA test, \*\*\*  $p < 0.001$ , \*\*\*\*  $p < 0.0001$ ).
- (c) A schematic drawing of the 17mer prototype biosensor.
- (d) The averaged FRET ratios of the wild-type and mutant 17mer prototype biosensors (K27L, K27M, Y26K) (upper panel) and their DIC (middle panel) and FRET ratio images (lower panel) in HEK cells (One-way ANOVA test, \*\*\*  $p < 0.001$ , \*\*\*\*  $p < 0.0001$ ).
- (e) Comparison of the FRET ratios among the wild-type EV-linker, 34mer and 17mer prototype biosensors expressed in HEK cells. (One-way ANOVA test, \*\*\*\*  $p < 0.0001$ ). (Scale bar 10 μm.)

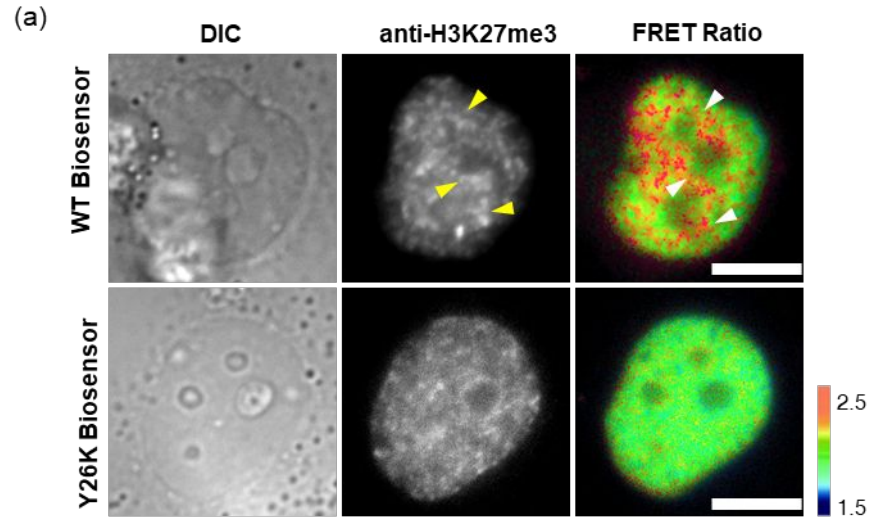

**Supplementary Figure 3. The spatial distribution of H3K27me3 in nucleus.**

(a). The representative images of H3K27me3 distribution in the nucleus as represented by the immunofluorescence staining assay (middle) and FRET imaging (right). In contrast to the control mutant biosensor, the wild-type biosensor showed a clear correlation with the immunofluorescence staining by an antibody in the nucleus (Scale bar = 10  $\mu$ m) .

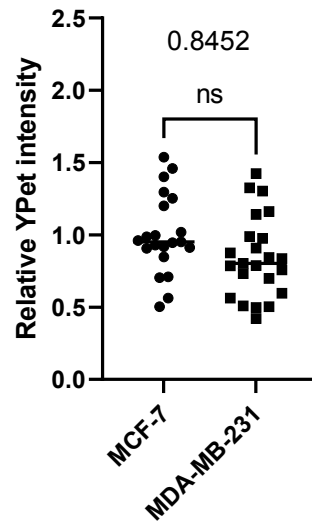

**Supplementary Figure 4. Quantification of biosensor expression in different cell types.**

The biosensor expression is represented by the relative YPet intensity in the nucleus. No significant difference was found between these two groups. (n=21 and 23, respectively, Student's t-test, ns p=0.8452).

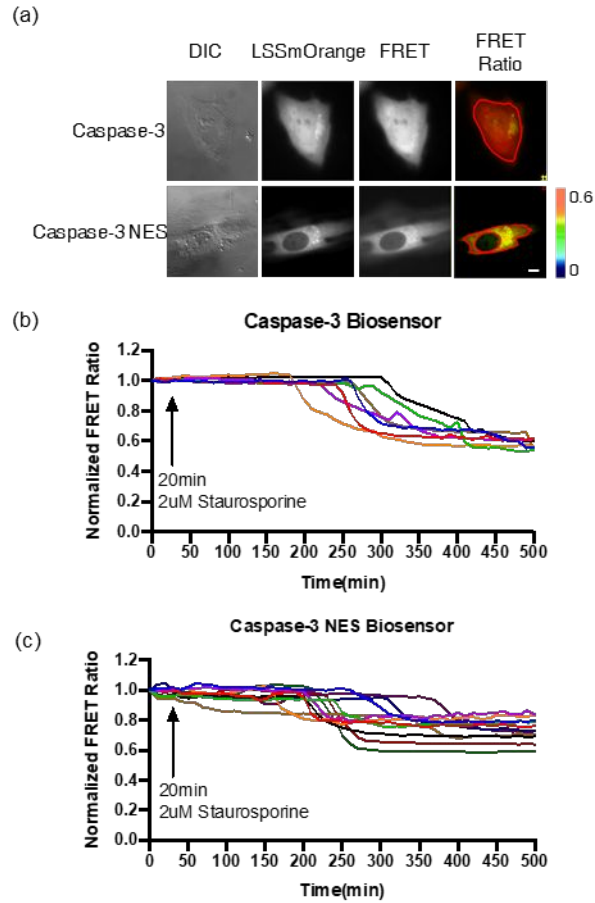

### Supplementary Figure 5. Characterization of the Caspase-3 NES biosensor

(a) Images of the Hela cells with either caspase 3 biosensor (Upper) and caspase-3 NES biosensor (Lower) taken in DIC, LSSmOrange, FRET channels and their FRET ratio images.

(b-c) The FRET ratio changes of the caspase-3 biosensor (b) or the caspase-3 NES biosensor (c) in Hela cells after the induction of cell apoptosis by staurosporine. FRET ratio images were taken every 10 minutes.

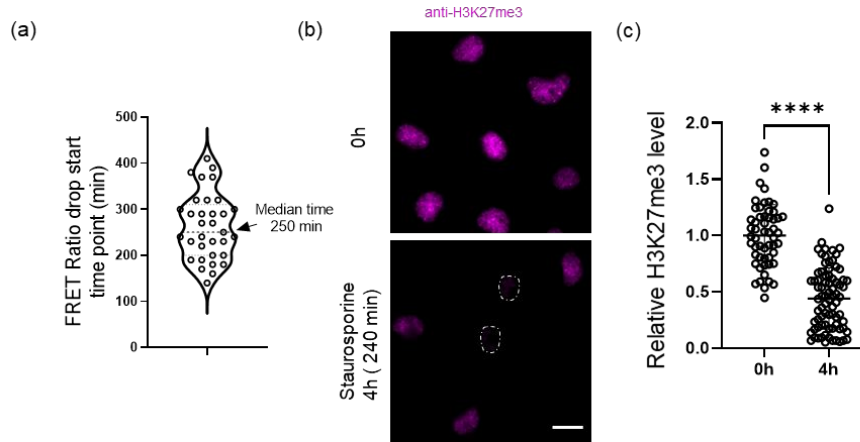

**Supplementary Figure 6. Demethylation of H3K27 during apoptosis.**

(a). Quantification of demethylation start time point measured by the FRET assay in live cell imaging. The median time of FRET ratio drop is 250 min.

(b-c). The representative images (b) and quantification (c) of H3K27me3 in immunofluorescence staining assay. Significant demethylation was found after staurosporine treatment for 4 hours (n=58 and 74, respectively in c, Student's t-test,  $p < 0.0001$ ). Scale bar = 20  $\mu$ m in b.

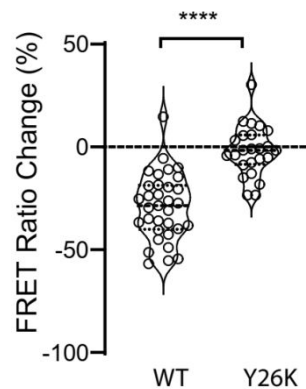

**Supplementary Figure 7. The FRET ratio changes of the FRET biosensors in apoptotic cells.**

The FRET Ratio change of wild type or Y26K mutant biosensors in the HeLa cells after staurosporine treatment for 4 hr. (n=33 and 24, respectively, Student's t-test, \*\*\*\* $p < 0.0001$ ).
